## RESEARCH ARTICLE

# Forecasting effects of “fast-tracks” for surgery in the Swedish national guidelines for distal radius fractures

Viktor Schmidt<sup>1\*</sup>, Cecilia Mellstrand Navarro<sup>2,3</sup>, Marcus Ottosson<sup>1</sup>, Magnus Tägil<sup>4</sup>, Albert Christersson<sup>5</sup>, Markus Engquist<sup>6</sup>, Arkan Sayed-Noor<sup>2</sup>, Sebastian Mukka<sup>1</sup>, Mats Wadsten<sup>1</sup>

**1** Department of Surgical and Perioperative Sciences (Orthopedics), Umeå University, Umeå, Sweden, **2** Department of Clinical Science and Education, Södersjukhuset, Karolinska Institutet, Stockholm, Sweden, **3** Department of Hand Surgery, Södersjukhuset, Stockholm, Sweden, **4** Department of Clinical Sciences Lund, Orthopedics, Lund University, Lund, Sweden, **5** Department of Orthopedics, Institution of Surgical Sciences, Uppsala University, Uppsala, Sweden, **6** Department of Orthopedics, Ryhov Hospital, Jönköping, Sweden

\* [viktor.schmidt@umu.se](mailto:viktor.schmidt@umu.se)

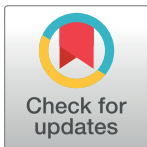

## OPEN ACCESS

**Citation:** Schmidt V, Mellstrand Navarro C, Ottosson M, Tägil M, Christersson A, Engquist M, et al. (2022) Forecasting effects of “fast-tracks” for surgery in the Swedish national guidelines for distal radius fractures. PLoS ONE 17(2): e0260296. <https://doi.org/10.1371/journal.pone.0260296>

**Editor:** Osama Farouk, Assiut University Faculty of Medicine, EGYPT

**Received:** June 30, 2021

**Accepted:** November 7, 2021

**Published:** February 10, 2022

**Copyright:** © 2022 Schmidt et al. This is an open access article distributed under the terms of the [Creative Commons Attribution License](https://creativecommons.org/licenses/by/4.0/), which permits unrestricted use, distribution, and reproduction in any medium, provided the original author and source are credited.

**Data Availability Statement:** All relevant data are within the manuscript and its [Supporting Information](#) files.

**Funding:** Financial support was provided by Landstinget Västernorrland (grant number LVNFOU921951). The funders had no role in study design, data collection and analysis, decision to publish, or preparation of the manuscript.

**Competing interests:** All the authors declare no conflict of interest related to this study. Co-authors CMN, MT, AC, ME, and MW took part in developing

## Abstract

### Background and purpose

National guidelines for treatment of distal radius fractures (DRFs) were presented in Sweden in 2021. In the guidelines, a fast-track is recommended for 4 subgroups of highly unstable DRFs. Regardless of the results of the closed reduction these are recommended for surgery within 1 week of injury. This study aims to evaluate the potential consequences of the newly presented national guidelines on incidence of surgical interventions.

### Patients and methods

In all, 1,609 patients (1,635 DRFs) with primary radiographs after a DRF between 2014 and 2017 at two Swedish hospitals were included in a retrospective cohort study. An estimation was made of the percentage of patients in the historical pre-guidelines cohort, that would have been recommended early primary surgery according to the new national guidelines compared to treatment implemented without the support of these guidelines.

### Results

On a strict radiological basis, 32% (516 out of 1635) of DRFs were classified into one of the 4 defined subgroups. At 9–13 days follow-up, cast treatment was converted into delayed primary surgery in 201 cases. Out of these, 56% (112 out of 201) fulfilled the fast-track criteria and would with the new guidelines have been subject to early primary surgery.

### Interpretation

The fast-track regimen in the new guidelines, has a high likelihood of identifying the unstable fractures benefitting from early primary surgery. If the proposed Swedish national guidelines for DRF treatment are implemented, a greater proportion of fractures would be treated with

the Swedish national guidelines for DRFs. This does not alter our adherence to PLOS ONE policies on sharing data and materials.

early primary surgery, and a delayed surgery avoided in the majority of cases. The potential benefits in relation to possible costs when using the fast-track criteria in every day practice are still unknown.

## Introduction

Distal radius fracture (DRF) is the most common fracture in adults [1, 2] and the incidence is increasing worldwide [2, 3]. Thus, DRFs represent a large part of emergency department visits [3].

Fracture treatment is decided based on radiological features and patient-related factors. What kind of surgery to recommend is under debate, as is surgical timing [4–9]. During the 21<sup>st</sup> century, preferences towards surgical intervention have increased [10–13]. In displaced fractures surgical treatment is more likely to restore anatomical alignment than nonsurgical treatment [14, 15], which could be important in obtaining good clinical outcomes [15]. Moreover, there are indications that early primary surgery provides better outcomes for hand function than delayed primary surgery [6, 14].

Due to conflicting definitions for acceptable radiological alignment [16–26], there are differences both between [21–26] and within countries [12, 13, 27–29] regarding treatment recommendations for DRFs.

To avoid unwarranted treatment variations several national guidelines have been published in recent years [21–26]. In April 2021, Swedish national guidelines [30] were presented by a multi-professional group working on behalf of the Swedish Association of Local Authorities and Regions (SALAR, SKR).

The Swedish national guidelines have identified 4 subgroups of radiological features of fractures that, due to inherent instability, are considered to have a minimal chance of successful nonoperative treatment, defined as healing in an acceptable position. To minimize treatment-delay the Swedish national guidelines recommend that patients with these fractures undergo surgery within 1 week of injury without further radiological follow-up visits, regardless of radiological alignment after closed reduction. Treatment recommendations of this type have not been proposed in other national guidelines [21–26].

This study aims to evaluate whether and to what extent the newly introduced fast-track regimen will affect the proportions of fractures treated with early and delayed primary surgery.

## Patients and methods

### Study design and settings

This retrospective cohort study included 1,609 consecutive patients treated for DRF (1,635 DRFs) at Sundsvall Hospital and Umeå University Hospital between January 2014 and January 2018. The Sundsvall Hospital is a second referral hospital with a catchment area of 150,000 inhabitants. Umeå University Hospital is a tertiary referral hospital with a catchment area of approximately 160,000 inhabitants. We designed and conducted the study after the development of new national guidelines to evaluate the potential effects on fracture care of a fast-track treatment regimen suggested in the new guidelines.

### Participants and data collection

The study population (all patients > 18 years of age with a DRF) was identified through an electronic database search for the ICD-10 code [31] for a DRF (ICD S52.5 and S52.6) at Sundsvall Hospital and Umeå University Hospital. The data were collected through analysis of

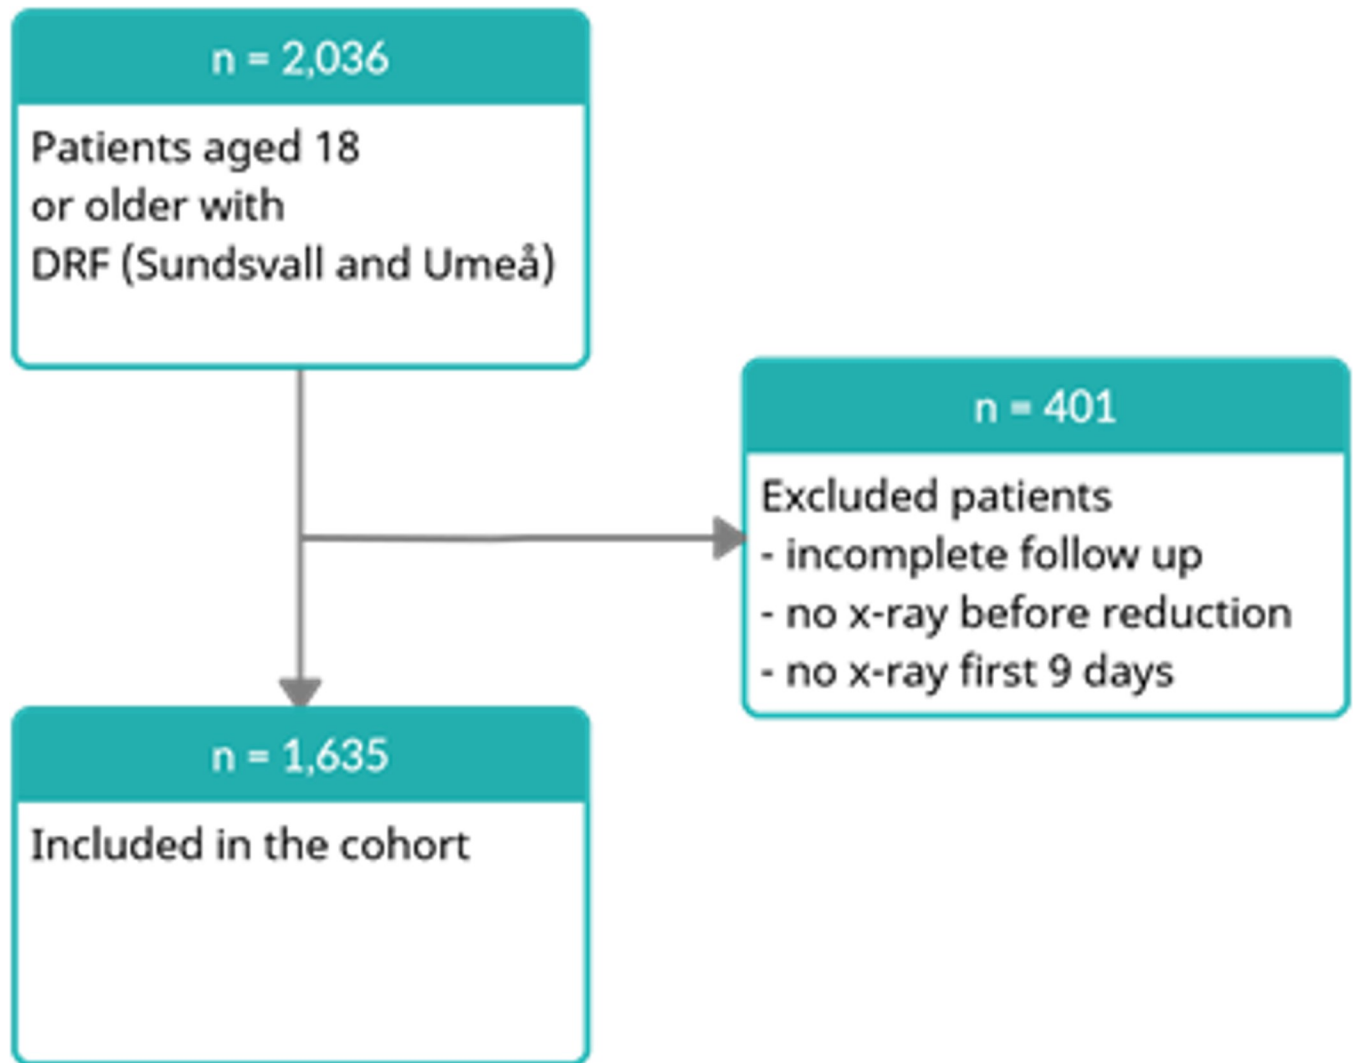

**Fig 1. Flowchart of patient inclusion and exclusion in a retrospective cohort study of 1,635 distal radius fractures (DRF) in two hospitals in Sweden in 2014–2017.**

<https://doi.org/10.1371/journal.pone.0260296.g001>

radiographs and a review of the medical records. The ethics committee waived the requirement for informed consent. We excluded patients without a primary radiograph before reduction or within 9 days of injury (Fig 1).

Data was collected from the medical records. Operative or nonoperative treatment was noted, and if operated, whether surgery was early or delayed. Early primary surgery was defined as a surgery decision based on radiographs from the first health care visit only. Delayed primary surgery was defined as surgery decided after the outpatient clinic visit at 9–13-days. Additional clinical data such as age, sex, suspected osteoporosis, diagnosed dementia (yes/no), domestic care services (yes/no), institutional living (yes/no) and fracture characteristics were recorded. Data on cognitive impairment, domestic care services and institutional living were collected and assessed through a patient record review until the date of injury. For all patients, treatment was according to surgeons preferred method and before the Swedish national guidelines were established. In general, this meant that treatment after surgery was: 5 weeks immobilization after pinning or external-fixation and 2 weeks after volar plating. After cast/external

fixator removal, therapy was initiated either as a home exercise program or together with an occupational therapist.

### Summary of the Swedish national guidelines

The Swedish National Guidelines for treatment of distal radius fractures were developed in 2019–2021 by an interprofessional expert group consisting of orthopedic surgeons, hand surgeons, occupational therapists, physiotherapists, plaster technicians and patient representatives in order to provide health care staff support in their decision-making regarding patients with wrist fractures. The guidelines were synthesized based on existing local and international treatment recommendations, published scientific literature and the clinical experience in the expert group. The guidelines address the most common issues related to treatment and rehabilitation of distal radius fractures in adults. The complete version is available in Swedish online [30]. A summary of the guidelines in English is provided in Appendix 1.

Most treatment recommendations use patient age as the principal criterion for decision making. In contrast, the Swedish national guidelines for DRFs advise that the treatment choice is based on the patients’ functional demands, rather than age. The guidelines suggest three defined functional levels: High, intermediate or low functional demands. Criteria for each functional level are presented in Table 1 [30].

In the Swedish national guidelines for DRF treatment all fractures are judged based on radiographic findings. Nonsurgical treatment and cast immobilization is recommended for undisplaced fractures. In displaced fractures, closed reduction and casting are recommended. If closed reduction fails to restore anatomy within the stated limits, early primary surgery, defined as surgery within 1 week of injury, is recommended. For most patients undergoing nonoperative treatment, a radiographic control at 9–13 days is recommended and if the fracture alignment is poor, delayed primary surgery is advised. Surgery could be considered even for minor redisplacement at the 9-13-day control if displacement has occurred, although within the threshold.

In addition to the part of the guidelines using radiographic displacement as a proxy for stability, a second part was suggested. In this, the fracture type was used to predict loss of position

**Table 1. Functional demands and treatment thresholds as presented by the Swedish national guidelines for DRFs [30].**

| Functional demands | Interpretation                                                                                                                                                     | Acceptable alignment                                                                                                                                                                                                                                                                                                                                     |
|--------------------|--------------------------------------------------------------------------------------------------------------------------------------------------------------------|----------------------------------------------------------------------------------------------------------------------------------------------------------------------------------------------------------------------------------------------------------------------------------------------------------------------------------------------------------|
| High               | Need to use the hand in heavy labor or activities in work, free time or daily activities.                                                                          | <ul style="list-style-type: none"> <li>• Dorsal angulation &lt; 10°</li> <li>• Volar angulation &lt; 15°</li> <li>• Radial inclination &gt; 15°</li> <li>• Ulnar variance &lt; 2 mm shortening</li> <li>• Intra-articular step &lt; 2 mm</li> <li>• Volar cortex continuity</li> <li>• Coronal shift &lt; 2 mm</li> <li>• Congruent DRU-joint</li> </ul> |
| Intermediate       | Need to use the hand in activities of daily living (ADL) independently, but without the need to load the wrist heavily in a physical labor or spare-time activity. | <ul style="list-style-type: none"> <li>• Dorsal angulation &lt; 20°</li> <li>• Volar angulation &lt; 15°</li> <li>• Radial inclination &gt; 10°</li> <li>• Ulnar variance &lt; 3 mm shortening</li> <li>• Intra-articular step &lt; 2 mm</li> <li>• Volar cortex continuity</li> <li>• Congruent DRU-joint</li> </ul>                                    |
| Low                | Permanent incapability to independently perform activities of daily living (ADLs).                                                                                 | No skin, nerve, or circulatory compromise                                                                                                                                                                                                                                                                                                                |

<https://doi.org/10.1371/journal.pone.0260296.t001>

between the time of fracture and the radiographic follow up. The present study centers on the 4 subgroups of DRF patients identified in the Swedish national guidelines to be suitable for early primary surgery, a fast-track, regardless of the closed reduction results (Fig 2). The Swedish national guidelines for DRF propose that, in patients with high or intermediate functional demands (Table 1), the following fracture subgroups should be considered for early primary surgery, even if acceptable alignment has been achieved after closed reduction and casting. Clinical examples of each subgroup are depicted in Fig 3.

1. Volar comminution, with comminution defined as a free-floating piece of cortex  $> 3$  mm [32].
2. Barton fracture (volar or dorsal) with displacement [33].
3. Smith fracture [33].
4. Simultaneous presence of dorsal comminution (a free-floating piece of cortex  $> 3$  mm [32]), severe initial displacement (dorsal angulation  $> 30^\circ$ , radial inclination  $< 10^\circ$ , or ulnar variance  $> 3$  mm), and clinical suspicion of physiological osteopenia/osteoporosis\*.

\*Sufficient data on clinical signs of physiological osteoporosis were not present for all individuals. Therefore, age  $> 50$  years was used as a proxy for osteopenia/osteoporosis in this study [34].

### Radiographic analysis

Three of the present authors (MW, VS, MO) performed the radiological measurements (Table 2). All measurements were performed on conventional wrist x-ray images (anteroposterior and lateral). Radial inclination, ulnar variance, dorsal tilt, intra-articular fracture and presence of comminution according to the guidelines' definition (dorsal/volar) were assessed on the primary radiograph (Fig 4).

All fractures that met the criteria for any of the 4 subgroups, as proposed for early primary surgery in the national guidelines (Fig 3) were identified.

### Outcomes

The proportion of patients fulfilling any of the radiological criteria for early primary surgical treatment according to the defined subgroups in the Swedish national guidelines for DRF treatment, served as primary outcome. Proportions were presented for each fracture subgroup.

Secondary outcome was the discrepancy between given treatment and treatment recommended by the guidelines (Fig 2) presented as the proportion of patients who would have been treated with early primary surgery instead of delayed primary surgery. Proportions were presented for each of the 4 criteria separately and for the total groups recommended for early primary surgery.

### Statistics

Numerical data were expressed as mean and standard deviation (SD) and median and interquartile range (IQR). Categorical data were presented as numbers and proportions and a corresponding 95% confidence interval (CI). A multivariate multinomial logistic regression model was used to analyze the 4 subgroups for surgery (hereafter called “fast-tracks”) (Table 3). Parameters that were significant in univariate analysis and available confounders were entered in the model. The outcome was final treatment (nonoperative, early primary surgery or delayed primary surgery) and the variables were age (continuous data), sex (nominal

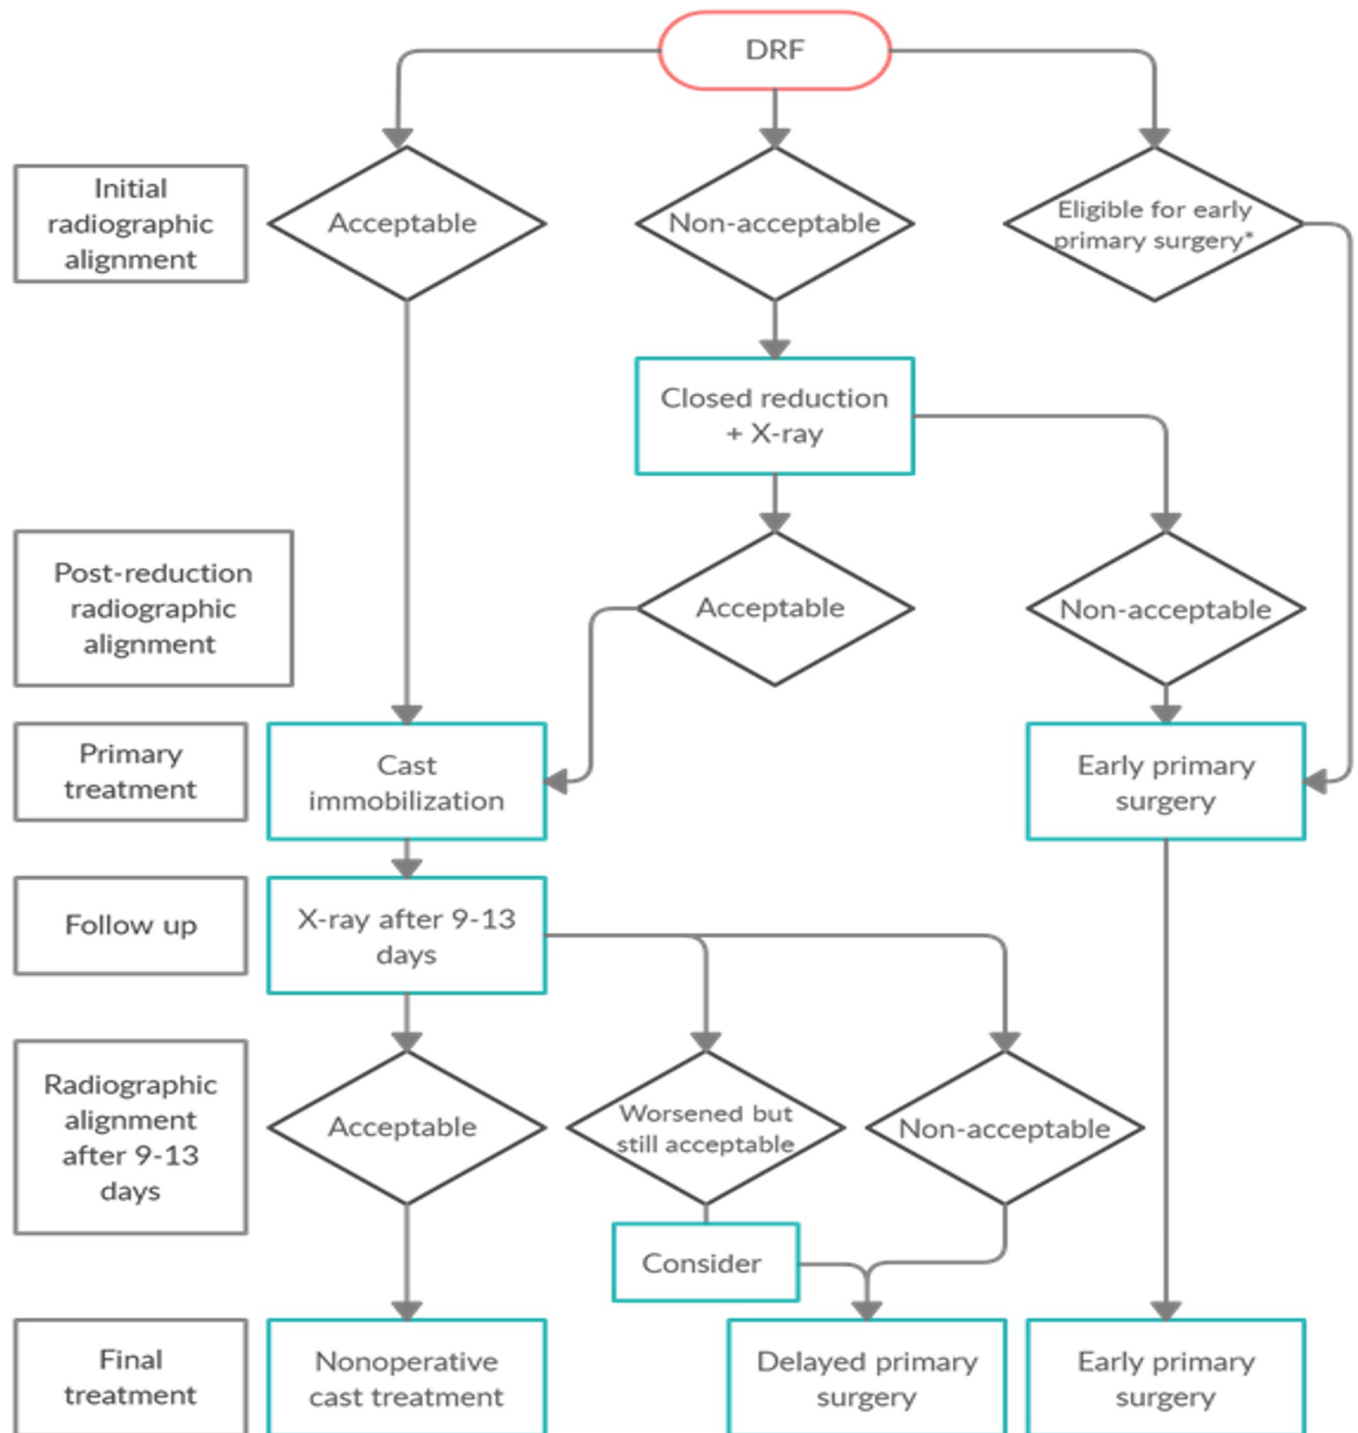

**Fig 2. Flow chart for treatment suggested in the Swedish national treatment guidelines for distal radius fractures (DRF).** \* According to the 4 defined subgroups (fast-tracks) analyzed in the present study.

<https://doi.org/10.1371/journal.pone.0260296.g002>

data), intra-articularity (nominal data) and fast-tracks (categorical data). In univariate analysis age was analyzed with ANOVA while sex, intra-articularity and fast-tracks were analyzed with chi-squared test. A p-value of < 0.05 was considered significant.

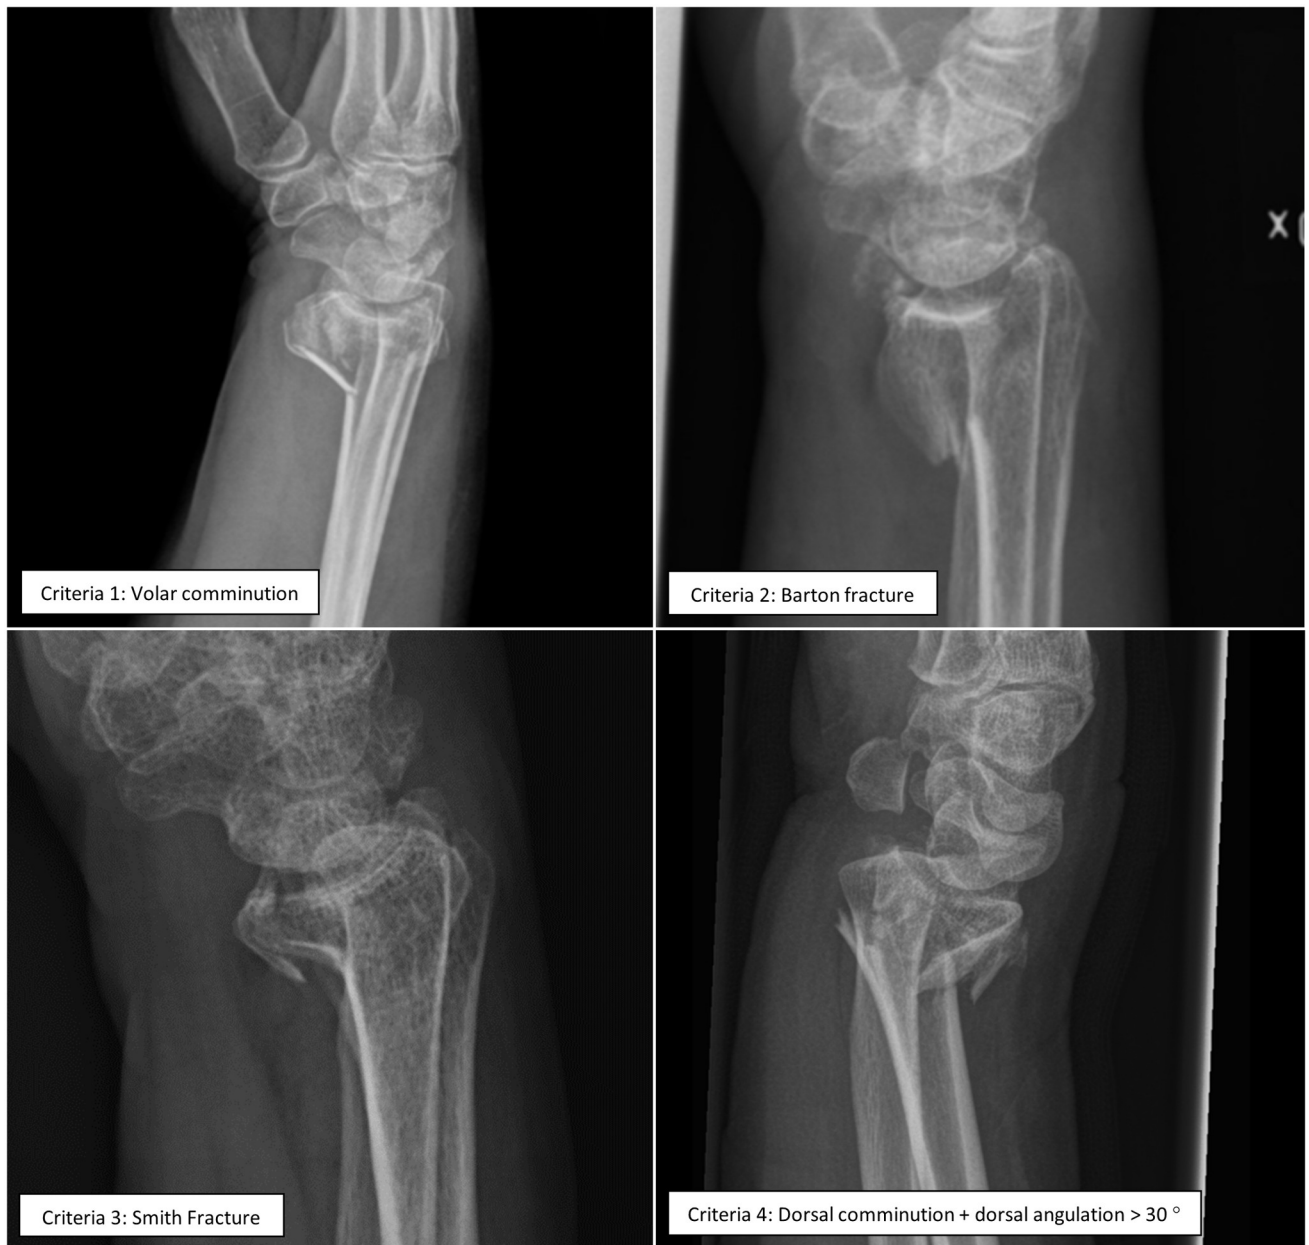

**Fig 3. Examples of fractures for each of the defined subgroups suggested in the Swedish national treatment guidelines for distal radius fractures.**

<https://doi.org/10.1371/journal.pone.0260296.g003>

**Table 2. Interrater reliability was measured between three raters with intraclass correlation coefficient in a retrospective cohort study of 1,635 DRFs in two hospitals in Sweden from 2014–2017. Measures < 0.50 are poor, between 0.50 and 0.75 moderate, between 0.75 and 0.90 good and > 0.90 excellent.**

| Intraclass correlation |                  |                |
|------------------------|------------------|----------------|
|                        | Average measures | Interpretation |
| Dorsal angulation      | 0.998            | Excellent      |
| Radial inclination     | 0.970            | Excellent      |
| Ulnar variance         | 0.931            | Excellent      |
| Intra-articular step   | 0.972            | Excellent      |

<https://doi.org/10.1371/journal.pone.0260296.t002>

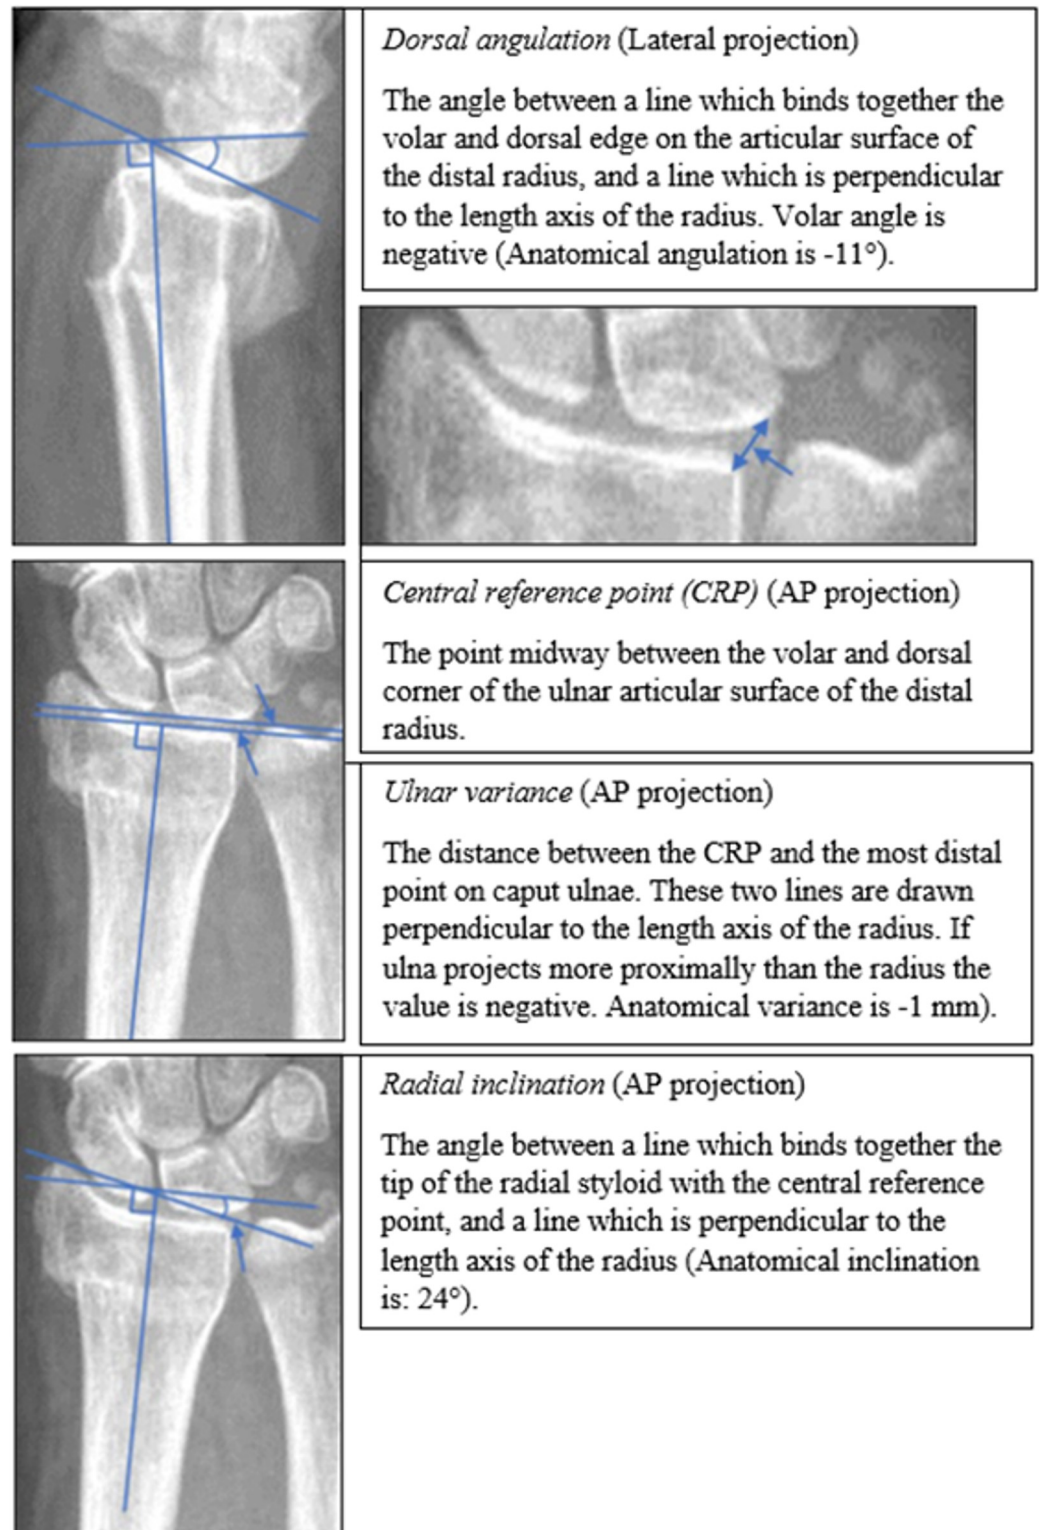

Fig 4. How radiological measurements were made in a retrospective cohort study of 1,635 DRFs in two hospitals in Sweden in 2014–2017.

<https://doi.org/10.1371/journal.pone.0260296.g004>



Intraclass correlation coefficient was used to measure interrater reliability for the radiological assessments.

Statistical analysis was performed using IBM SPSS Statistics (V26).

## Results

### Patients and descriptive data

1,609 patients with DRF (1,635 DRFs) were included. 79% (CI 76–80%) were women and the mean age was 61 years (SD 17) and median 63 years (IQR 52–72). 5% (CI 4–7%) of the patients over 65 had domestic care services.

18% (CI 16–20%) of the fractures were treated with early primary surgery (median 3, IQR 1–5 days until surgery) and 15% (CI 13–17%) of initially nonoperatively treated fractures were treated with delayed primary surgery (median 13, IQR 12–15 days until surgery). In total 30% (CI 28–33%) of the fractures were treated surgically.

### Outcomes

**Primary outcome.** 32% (CI 29–34%) of all the DRFs fulfilled radiological criteria for any 4 fast-track fracture types.

12% (CI 11–14%) displayed volar comminution, 1% (CI 0.6–1.7%) had a displaced Barton-fracture, 0.9% (CI 0.5–1.4%) a Smith-fracture and 18% (CI 16–20%) fulfilled the combination-criteria of the simultaneous presence of dorsal comminution, severe initial displacement and suspected physiological osteopenia/osteoporosis (Fig 5).

63% (CI 59–67%) of the fractures fulfilling criteria for the defined fast-tracks were surgically treated (Table 4).

Of the fractures fulfilling the criteria for fast-tracks, only 41% (CI 37–46%) were treated with early primary surgery, and 59% (CI 54–63%) were initially treated with a cast. Of those fulfilling the criteria for fast-tracks that were initially treated with a cast, 37% (CI 32–43%) were treated with delayed primary surgery. In total 63% (CI 59–67%) of fractures fulfilling fast-track criteria were treated surgically.

**Secondary outcome.** Of all fractures treated with delayed primary surgery (regardless of fracture type), 56% (CI 49–63%) fulfilled the fast-track criteria and would have been recommended early primary surgery according to the guidelines (Table 5) (Umeå University hospital 73%, Sundsvall Hospital 48%).

**Treatment.** 68% (CI 66–71%) did not fulfill the criteria for any of the 4 fast-tracks. Of those, 8% (CI 6–9%) were treated with early primary surgery and, of the fractures initially treated nonoperatively, 9% (CI 7–10%) were treated with delayed primary surgery after radiological control. 15% (CI 13–18%) of the fractures that did not fulfill the criteria for any of the 4 fast-tracks were treated surgically.

A positive correlation between fast-track radiological criteria and surgical treatment was found (Table 3), indicating that DRFs that meet the criteria for fast-track were much more likely to be treated with primary surgery. Findings were significant in univariate and multivariate analysis adjusting for age, sex and intra-articular fracture ( $p < 0.001$ ) (Table 3).

Interrater reliability of radiological assessments was excellent (Table 5).

## Discussion

Nonoperative treatment in a cast is less stable for DRFs than surgical fixation, with malunion a well-known complication [15]. Displacement during nonsurgical treatment is common and delayed primary surgery is often necessary. To minimize unnecessary treatment delays the

**Table 3. Multivariate analysis with multinomial linear regression for treatment (nonoperative, early or delayed primary surgery) as the dependent variable in a retrospective cohort study of 1,635 DRFs in two hospitals in Sweden in 2014–2017.**

| Treatment <sup>b</sup>  |                   | P-value   | OR        | 95% Confidence interval for OR <sup>a</sup> |             |
|-------------------------|-------------------|-----------|-----------|---------------------------------------------|-------------|
|                         |                   |           |           | Lower bound                                 | Upper bound |
| Early primary surgery   | Age               | .000      | .968      | .959                                        | .978        |
|                         | FT <sup>c</sup> 4 | .000      | 13.496    | 9.188                                       | 19.825      |
|                         | FT <sup>c</sup> 3 | .000      | 21.711    | 5.830                                       | 80.848      |
|                         | FT <sup>c</sup> 2 | .000      | 81.898    | 17.538                                      | 382.451     |
|                         | FT <sup>c</sup> 1 | .000      | 21.207    | 13.847                                      | 32.481      |
|                         | FT <sup>c</sup> 0 | Reference | Reference | .                                           | .           |
|                         | IA <sup>d</sup> 0 | .292      | .848      | .623                                        | 1.153       |
|                         | IA <sup>d</sup> 1 | Reference | Reference | .                                           | .           |
|                         | Male              | .118      | .733      | .496                                        | 1.083       |
|                         | Female            | Reference | Reference | .                                           | .           |
| Delayed primary surgery | Age               | .000      | .979      | .968                                        | .989        |
|                         | FT <sup>c</sup> 4 | .000      | 6.531     | 4.363                                       | 9.776       |
|                         | FT <sup>c</sup> 3 | .001      | 12.050    | 2.901                                       | 50.049      |
|                         | FT <sup>c</sup> 2 | .001      | 24.086    | 3.912                                       | 148.314     |
|                         | FT <sup>c</sup> 1 | .000      | 9.422     | 5.863                                       | 15.143      |
|                         | FT <sup>c</sup> 0 | Reference | Reference | .                                           | .           |
|                         | IA <sup>b</sup> 0 | .044      | 1.400     | 1.009                                       | 1.943       |
|                         | IA <sup>b</sup> 1 | Reference | Reference | .                                           | .           |
|                         | Male              | .001      | .457      | .284                                        | .736        |
|                         | Female            | Reference | Reference | .                                           | .           |

a. OR = Odds ratio.

b. The reference category is Nonoperative.

c. FT = Fast-track, where 1 is Volar, 2 is Barton, 3 is Smith, 4 is Combination and 0 is none.

d. IA = Intra-articular, where 0 is no and 1 is yes.

<https://doi.org/10.1371/journal.pone.0260296.t003>

Swedish national guidelines for treating DRFs introduced fast-tracks for 4 defined subgroups of highly unstable fracture types. According to our results, almost one of three DRFs fulfilled the radiological criteria for any of the fast-tracks and would potentially be recommended for early primary surgery. At the same time, the total number of patients subject to treatment with delayed primary surgery would be avoided in a majority of cases in a setting where the new guidelines are fully implemented. We believe that healthcare systems would benefit from limiting the number of patients planned for radiographic follow-up and delayed surgery.

The 4 fast-tracks were defined based on inherent fracture instability. Volar comminution is a highly unstable fracture characteristic [35]. This particular fracture type was also fairly common in the present study (12%). Barton and Smith fractures are known for their complexity and instability; however, they were quite rare (1.0% and 0.9%, respectively). The combination fast-track (18%) described in the Swedish national guidelines was created because there is evidence of instability in dorsally comminuted fractures and older patients [36, 37]. A combination of these two factors and an initial severe displacement create a highly unstable fracture pattern, considered to have a redisplacement risk after closed reduction of > 90% [30].

A majority of patients treated with delayed primary surgery in our study would instead receive early primary surgery under the full implementation of the new guidelines. Not only would a shorter time to surgery reduce the time of immobilization (10 days in our material) and potentially speed up the return to work but it may also benefit the patient in terms of a

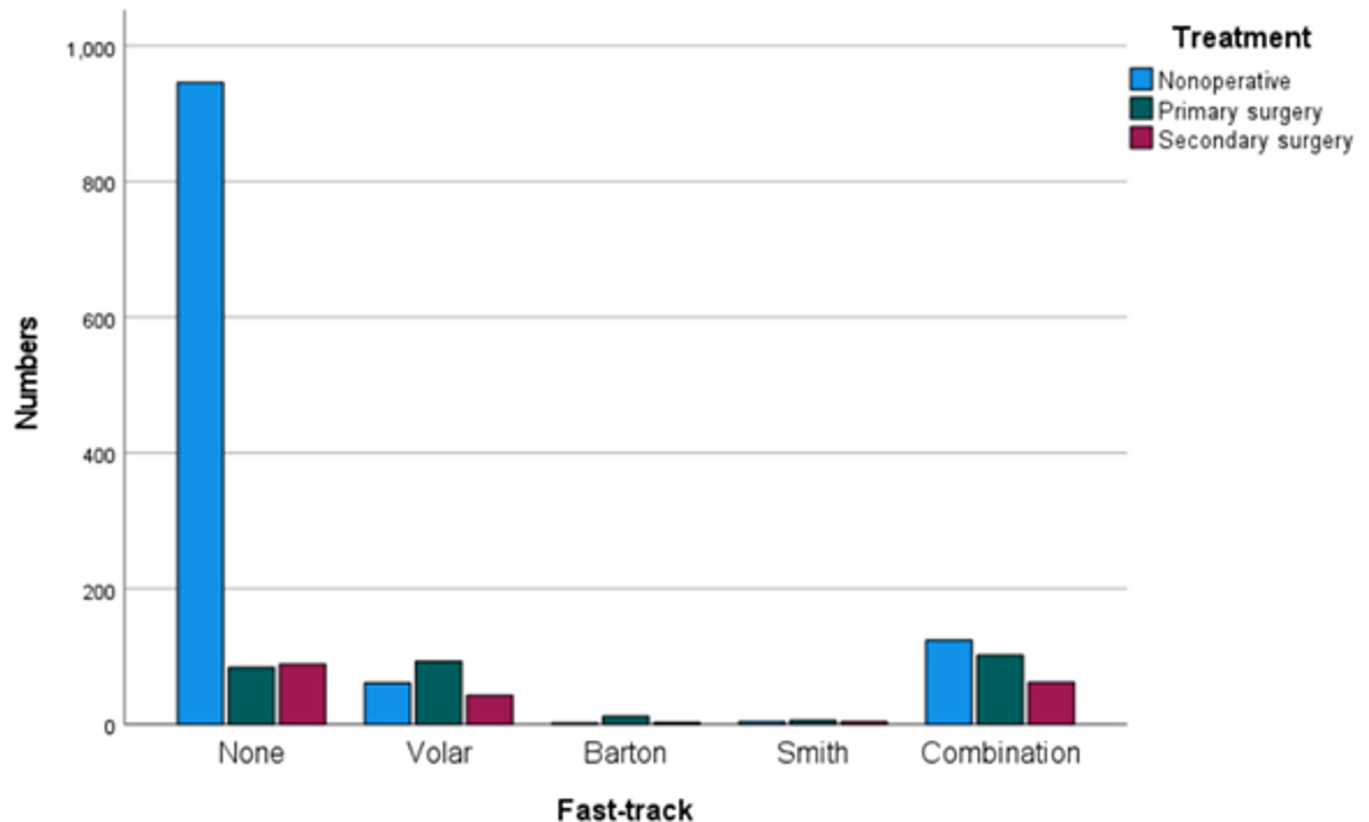

**Fig 5.** Bar chart depicting differences in treatment depending on fracture type in a retrospective cohort study of 1,635 DRFs in two hospitals in Sweden in 2014–2017. None: Fracture did not fulfill the criteria for any of the categories listed below. Volar: Volar comminution, defined as a free-floating piece of cortex > 3 mm. Barton: Intra-articular volar or dorsal fracture with displacement of the articular surface. Smith: Volar displacement of the distal fragment. Combination: Simultaneous presence of dorsal comminution, severe initial displacement (dorsal angulation > 30° or radial inclination < 10° or ulnar variance > 3 mm) and suspected physiological osteopenia/osteoporosis.

<https://doi.org/10.1371/journal.pone.0260296.g005>

**Table 4.** Presentation of fracture treatment depending on fracture type in a retrospective cohort study of 1,635 DRFs in two hospitals in Sweden in 2014–2017.

|                         |                                | Nonoperative | Early primary surgery | Delayed primary surgery | Total |
|-------------------------|--------------------------------|--------------|-----------------------|-------------------------|-------|
| <b>None<sup>a</sup></b> |                                | 946 (84.5%)  | 84 (7.5%)             | 89 (8.0%)               | 1119  |
| <b>Fast-track</b>       | <b>All<sup>b</sup></b>         | 191 (37.0%)  | 213 (41.3%)           | 112 (21.7%)             | 516   |
|                         | <b>Volar<sup>c</sup></b>       | 61 (31.0%)   | 93 (47.2%)            | 43 (21.8%)              | 197   |
|                         | <b>Barton<sup>d</sup></b>      | 2 (11.8%)    | 12 (70.6%)            | 3 (17.6%)               | 17    |
|                         | <b>Smith<sup>e</sup></b>       | 4 (28.6%)    | 6 (42.9%)             | 4 (28.6%)               | 14    |
|                         | <b>Combination<sup>f</sup></b> | 124 (43.1%)  | 102 (35.4%)           | 62 (21.5%)              | 288   |
| <b>Total</b>            |                                | 1137 (69.5%) | 297 (18.2%)           | 201 (12.3%)             | 1635  |

a. Fracture did not fulfill any of the fast-tracks.

b. Fracture fulfilled any one of the fast-tracks.

c. Volar comminution, defined as a free-floating piece of cortex > 3 mm.

d. Intra-articular volar or dorsal fracture with displacement of the articular surface.

e. Volar displacement of the distal fragment.

f. Simultaneous presence of dorsal comminution, severe initial displacement (dorsal angulation > 30° or radial inclination < 10° or ulnar variance > 3 mm) and suspected physiological osteopenia/osteoporosis.

<https://doi.org/10.1371/journal.pone.0260296.t004>

**Table 5. Presentation of how treatment could change with the new guidelines and implemented fast-track based on a retrospective cohort study of 1,635 distal radius fractures (DRF) in two hospitals in Sweden in 2014–2017.**

| Treatment               | Without guidelines | Change (n, %) | With guidelines |
|-------------------------|--------------------|---------------|-----------------|
| Early primary surgery   | 297 fractures      | +112 (+38%)   | 409 fractures   |
| Delayed primary surgery | 201 fractures      | -112 (-56%)   | 89 fractures    |

<https://doi.org/10.1371/journal.pone.0260296.t005>

better final functional outcome. Sirniö et al. concluded that treatment of DRFs with early palmar plating resulted in better 2-year functional outcomes for  $\geq 50$ -year-old patients compared with a primary nonoperative treatment protocol. Delayed surgery in case of secondary displacement was not beneficial in terms of function. [14]. Similarly, Mulders et al. found in a randomized controlled trial that patients treated with early primary surgery had significantly better patient-reported wrist function up to 12 months than patients who received delayed primary surgery [6]. In an earlier study, Abramo et al., a tendency for poorer outcome scores with delayed primary surgery was found in patient-reported outcome [38].

Our study detected a difference between the two study centers in proportions of potential fast-track patients treated with early primary surgery, illustrating that the impact of the new guidelines will vary between hospitals and departments depending on previously used treatment regimens and local traditions. The new treatment recommendations may lead to unnecessary surgery, given that one third of the patients meeting the fast-track criteria were treated nonoperatively in our study. We believe that these include patients with low functional demands, high age, patients declining surgery despite surgeon recommendations, and furthermore fractures with late displacement occurring after radiological follow-up. Future studies are needed to determine the clinical and radiological outcome of these fractures.

Only 5% of the population in our cohort over 65 years of age had low functional demands, defined as domestic care services or institutional living documented in the medical record. The actual number in the regions is about 18% on average for 2014–2017 [39]. Thus, only about one quarter of the expected prevalence was documented. The discrepancy can be explained as this is a retrospective cohort with data collected through patient record review. The incidence of DRFs could even be higher in a more fragile population. For instance, people with dementia have a higher risk of falling, which supports the high incidence of nonoperative treatment in the historical cohort [40]. On the other hand, DRFs in the elderly may be a clinical marker for high physical function. This argument is based on the notion that a patient with low functional demands would be more likely to sustain a hip or vertebral fracture because the simple act of stretching out the arm during a fall is a demonstration of maintenance of function [41]. The new national guidelines may draw attention to surgical treatment of vital elderly patients who may be subject to a conservative regime due solely to their chronological age [7].

Many DRFs with volar comminution were treated nonoperatively. However, evidence suggests that only very few fractures with volar comminution heal in an acceptable alignment. Almost 80% displace on radiological follow-up and of the remaining fractures, another 80% displace later, resulting in a displacement rate of  $> 95\%$  [35]. Therefore, in patients with volar comminution we do not believe that the new national guidelines will lead to unnecessary surgery.

The retrospective study design has inherent limitations. All clinical results are estimates from medical records and assess only how patients were treated and not how they should have been treated, according to the guidelines. We cannot determine whether patients with nonoperative treatment would have benefited from surgery or vice versa. Moreover, we do not have complete data on suspected osteopenia or osteoporosis. Data have been published showing that patients with DRFs aged 50–75 years have osteopenia or osteoporosis in 83% of cases

(75% for men, 84% women) [34], which motivates the use of age > 50 years as a proxy. We believe this is reasonable, with 83% being a strong enough probability of categorizing these patients as having suspected osteopenia or osteoporosis. Lastly, large differences in local treatment traditions exist [12] and therefore the impact of the new national guidelines will vary considerably. However, we present data from two centers close to the national average regarding operative treatment for DRFs according to the Swedish Fracture Registry (Sundsvall: 31.7%, Umeå 28.8%, national average 32.3%). The rates of surgical intervention in Sweden are comparable to those of other countries with a similar standard of living (USA 34% [42], Norway 28% [43]). Based on the Swedish Fracture Registry, the implementation of the guidelines could be further studied on a national level by the Swedish Fracture Registry. Another aspect of evaluating national guidelines is the limited effect that expert criteria may have on surgeons [44].

## Conclusion

The Swedish national guidelines for DRFs may increase the number of early primary surgeries. This increase is estimated to be compensated for by reduced suffering and sick leave, reduced need for return visits, reduced frequency of delayed primary surgeries, reduced frequency of osteotomies and a better functional outcome [30].

Based on the data in the present study, the Swedish national guidelines may risk recommending a few overabundant surgeries. At the same time, a majority of patients treated with delayed primary surgery will be spared 9–13 days in cast waiting for radiological control. When adding to the equation that early primary surgery can benefit the final prognosis, these recommendations seem to be justified.

## Supporting information

**S1 Appendix. Summary of the Swedish national guidelines.**  
(DOCX)

**S1 Data. Data for PLOS ONE.** All the data used in the study.  
(SAV)

## Acknowledgments

The authors thank Erling Englund, who performed statistical analyses. The authors also thank the whole working party that developed the Swedish national guidelines.

## Author Contributions

**Conceptualization:** Sebastian Mukka, Mats Wadsten.

**Data curation:** Viktor Schmidt, Marcus Ottosson, Sebastian Mukka, Mats Wadsten.

**Formal analysis:** Viktor Schmidt, Cecilia Mellstrand Navarro, Marcus Ottosson, Sebastian Mukka, Mats Wadsten.

**Funding acquisition:** Arkan Sayed-Noor.

**Investigation:** Sebastian Mukka, Mats Wadsten.

**Methodology:** Sebastian Mukka, Mats Wadsten.

**Project administration:** Viktor Schmidt, Arkan Sayed-Noor, Sebastian Mukka, Mats Wadsten.

**Resources:** Arkan Sayed-Noor, Sebastian Mukka.

**Software:** Viktor Schmidt.

**Supervision:** Cecilia Mellstrand Navarro, Arkan Sayed-Noor, Sebastian Mukka, Mats Wadsten.

**Validation:** Cecilia Mellstrand Navarro, Sebastian Mukka, Mats Wadsten.

**Visualization:** Sebastian Mukka, Mats Wadsten.

**Writing – original draft:** Viktor Schmidt, Cecilia Mellstrand Navarro, Sebastian Mukka, Mats Wadsten.

**Writing – review & editing:** Viktor Schmidt, Cecilia Mellstrand Navarro, Magnus Tägil, Albert Christersson, Markus Engquist, Arkan Sayed-Noor, Sebastian Mukka, Mats Wadsten.

## References

1. van Staa TP, Dennison EM, Leufkens HG, Cooper C. Epidemiology of fractures in England and Wales. *Bone*. 2001; 29: 517–522. [https://doi.org/10.1016/s8756-3282\(01\)00614-7](https://doi.org/10.1016/s8756-3282(01)00614-7) PMID: 11728921
2. Nellans KW, Kowalski E, Chung KC. The Epidemiology of Distal Radius Fractures. *Hand Clinics*. 2012; 28: 113–125. <https://doi.org/10.1016/j.hcl.2012.02.001> PMID: 22554654
3. MacIntyre NJ, Dewan N. Epidemiology of distal radius fractures and factors predicting risk and prognosis. *J Hand Ther*. 2016; 29: 136–145. <https://doi.org/10.1016/j.jht.2016.03.003> PMID: 27264899
4. Navarro CM, Pettersson HJ, Enocson A. Complications after distal radius fracture surgery: results from a Swedish nationwide registry study. *J Orthop Trauma*. 2015; 29: e36–42. <https://doi.org/10.1097/BOT.000000000000199> PMID: 25050752
5. Costa ML, Achten J, Rangan A, Lamb SE, Parsons NR. Percutaneous fixation with Kirschner wires versus volar locking-plate fixation in adults with dorsally displaced fracture of distal radius: five-year follow-up of a randomized controlled trial. *Bone Joint J*. 2019; 101-B: 978–983. <https://doi.org/10.1302/0301-620X.101B8.BJJ-2018-1285.R1> PMID: 31362548
6. Mulders MAM, Walenkamp MMJ, van Dieren S, Goslings JC, Schep NWL, VIPER Trial Collaborators. Volar Plate Fixation Versus Plaster Immobilization in Acceptably Reduced Extra-Articular Distal Radial Fractures: A Multicenter Randomized Controlled Trial. *J Bone Joint Surg Am*. 2019; 101: 787–796. <https://doi.org/10.2106/JBJS.18.00693> PMID: 31045666
7. Saving J, Severin Wahlgren S, Olsson K, Enocson A, Ponzer S, Sköldenberg O, et al. Nonoperative Treatment Compared with Volar Locking Plate Fixation for Dorsally Displaced Distal Radial Fractures in the Elderly: A Randomized Controlled Trial. *J Bone Joint Surg Am*. 2019; 101: 961–969. <https://doi.org/10.2106/JBJS.18.00768> PMID: 31169572
8. Saving J, Enocson A, Ponzer S, Mellstrand Navarro C. External Fixation Versus Volar Locking Plate for Unstable Dorsally Displaced Distal Radius Fractures-A 3-Year Follow-Up of a Randomized Controlled Study. *J Hand Surg Am*. 2019; 44: 18–26. <https://doi.org/10.1016/j.jhsa.2018.09.015> PMID: 30420192
9. Karantana A, Handoll HH, Sabouni A. Percutaneous pinning for treating distal radial fractures in adults. *Cochrane Bone, Joint and Muscle Trauma Group, editor. Cochrane Database of Systematic Reviews*. 2020 [cited 31 May 2021]. <https://doi.org/10.1002/14651858.CD006080.pub3> PMID: 32032439
10. Mellstrand-Navarro C, Pettersson HJ, Tornqvist H, Ponzer S. The operative treatment of fractures of the distal radius is increasing: results from a nationwide Swedish study. *Bone Joint J*. 2014; 96-B: 963–969. <https://doi.org/10.1302/0301-620X.96B7.33149> PMID: 24986952
11. Roos H, Karlsson M, Karlsson J, Roos H. *Ortopedi: patofysiologi, sjukdomar och trauma hos barn och vuxna*. 2018.
12. Saving J, Ponzer S, Enocson A, Mellstrand Navarro C. Distal radius fractures-Regional variation in treatment regimens. *PLoS ONE*. 2018; 13: e0207702. <https://doi.org/10.1371/journal.pone.0207702> PMID: 30444926
13. Swedish National Quality Registry for Fractures. Svenska Frakturregistret. Available: <https://sfr.registercentrum.se/>.
14. Sirniö K, Leppilähti J, Ohtonen P, Flinkkilä T. Early palmar plate fixation of distal radius fractures may benefit patients aged 50 years or older: a randomized trial comparing 2 different treatment protocols. *Acta Orthop*. 2019; 90: 123–128. <https://doi.org/10.1080/17453674.2018.1561614> PMID: 30669897

15. Ochen Y, Peek J, van der Velde D, Beeres FJP, van Heijl M, Groenwold RHH, et al. Operative vs Non-operative Treatment of Distal Radius Fractures in Adults: A Systematic Review and Meta-analysis. *JAMA Netw Open*. 2020; 3: e203497. <https://doi.org/10.1001/jamanetworkopen.2020.3497> PMID: [32324239](https://pubmed.ncbi.nlm.nih.gov/32324239/)
16. Wilcke MKT, Abbaszadegan H, Adolphson PY. Patient-perceived outcome after displaced distal radius fractures. A comparison between radiological parameters, objective physical variables, and the DASH score. *J Hand Ther*. 2007; 20: 290–298; quiz 299. <https://doi.org/10.1197/j.jht.2007.06.001> PMID: [17954350](https://pubmed.ncbi.nlm.nih.gov/17954350/)
17. Finsen V, Rod O, Rød K, Rajabi B, Alm-Paulsen PS, Russwurm H. The relationship between displacement and clinical outcome after distal radius (Colles’) fracture. *J Hand Surg Eur Vol*. 2013; 38: 116–126. <https://doi.org/10.1177/1753193412445144> PMID: [22618559](https://pubmed.ncbi.nlm.nih.gov/22618559/)
18. Kodama N, Takemura Y, Ueba H, Imai S, Matsusue Y. Acceptable parameters for alignment of distal radius fracture with conservative treatment in elderly patients. *J Orthop Sci*. 2014; 19: 292–297. <https://doi.org/10.1007/s00776-013-0514-y> PMID: [24338051](https://pubmed.ncbi.nlm.nih.gov/24338051/)
19. Lutz K, Yeoh KM, MacDermid JC, Symonette C, Grewal R. Complications associated with operative versus nonsurgical treatment of distal radius fractures in patients aged 65 years and older. *J Hand Surg Am*. 2014; 39: 1280–1286. <https://doi.org/10.1016/j.jhsa.2014.04.018> PMID: [24881899](https://pubmed.ncbi.nlm.nih.gov/24881899/)
20. Cowie J, Anakwe R, McQueen M. Factors associated with one-year outcome after distal radial fracture treatment. *J Orthop Surg (Hong Kong)*. 2015; 23: 24–28. <https://doi.org/10.1177/230949901502300106> PMID: [25920638](https://pubmed.ncbi.nlm.nih.gov/25920638/)
21. Nederlandse Vereniging voor Heelkunde. Distale radius fracturen. Diagnostiek en behandeling. 2010.
22. Lichtman DM, Bindra RR, Boyer MI, Putnam MD, Ring D, Slutsky DJ, et al. American Academy of Orthopaedic Surgeons clinical practice guideline on: the treatment of distal radius fractures. *J Bone Joint Surg Am*. 2011; 93: 775–778. <https://doi.org/10.2106/JBJS.938ebo> PMID: [21508285](https://pubmed.ncbi.nlm.nih.gov/21508285/)
23. Sundhedsstyrelsen D. National klinisk retningslinje for behandling af håndledsnære brud (distal radiusfraktur). Sundhedsstyrelsen-dk; 2014.
24. Kvernmo HD. Behandlingsretningslinjer for Håndledsbrudd hos voksne. Norsk Ortopedisk Förening; 2015.
25. Finska läkaresällskapet. Håndledsfraktur (benbrott på strålbenets nedre del). 2017.
26. Johnson NA, Dias J. The current evidence-based management of distal radial fractures: UK perspectives. *J Hand Surg Eur Vol*. 2019; 44: 450–455. <https://doi.org/10.1177/1753193419843201> PMID: [30991865](https://pubmed.ncbi.nlm.nih.gov/30991865/)
27. Fanuele J, Koval KJ, Lurie J, Zhou W, Tosteson A, Ring D. Distal radial fracture treatment: what you get may depend on your age and address. *J Bone Joint Surg Am*. 2009; 91: 1313–1319. <https://doi.org/10.2106/JBJS.H.00448> PMID: [19487507](https://pubmed.ncbi.nlm.nih.gov/19487507/)
28. Chung KC, Shauver MJ, Yin H, Kim HM, Baser O, Birkmeyer JD. Variations in the Use of Internal Fixation for Distal Radial Fracture in the United States Medicare Population. *Journal of Bone and Joint Surgery*. 2011; 93: 2154–2162. <https://doi.org/10.2106/JBJS.J.012802> PMID: [22159850](https://pubmed.ncbi.nlm.nih.gov/22159850/)
29. Walenkamp MMJ, Mulders MAM, Goslings JC, Westert GP, Schep NWL. Analysis of variation in the surgical treatment of patients with distal radial fractures in the Netherlands. *J Hand Surg Eur Vol*. 2017; 42: 39–44. <https://doi.org/10.1177/1753193416651577> PMID: [27289051](https://pubmed.ncbi.nlm.nih.gov/27289051/)
30. Mellstrand Navarro C. Nationellt vårdprogram för behandling av distala radiusfrakturer. 2021. Available: <https://d2flujgsl7escs.cloudfront.net/external/Nationellt+v%C3%A5rdprogram+f%C3%B6r+behandling+av+distala+radiusfrakturer.pdf>.
31. ICD-10. ICD-10: International statistical classification of diseases and related health problems. Geneva: World Health Organization; 2011.
32. Wadsten MÅ, Buttazzoni GG, Sjöden GO, Kadum B, Sayed-Noor AS. Influence of Cortical Comminution and Intra-articular Involvement in Distal Radius Fractures on Clinical Outcome: A Prospective Multi-center Study. *J Wrist Surg*. 2017; 6: 285–293. <https://doi.org/10.1055/s-0037-1601577> PMID: [29085730](https://pubmed.ncbi.nlm.nih.gov/29085730/)
33. Caldwell RA, Shorten PL, Morrell NT. Common Upper Extremity Fracture Eponyms: A Look Into What They Really Mean. *J Hand Surg Am*. 2019; 44: 331–334. <https://doi.org/10.1016/j.jhsa.2018.07.012> PMID: [30241976](https://pubmed.ncbi.nlm.nih.gov/30241976/)
34. Åstrand J, Thorngren K-G, Tägil M. One fracture is enough!: Experience with a prospective and consecutive osteoporosis screening program with 239 fracture patients. *Acta Orthopaedica*. 2006; 77: 3–8. <https://doi.org/10.1080/17453670610045623> PMID: [16534695](https://pubmed.ncbi.nlm.nih.gov/16534695/)
35. Wadsten MÅ, Sayed-Noor AS, Englund E, Buttazzoni GG, Sjöden GO. Cortical comminution in distal radial fractures can predict the radiological outcome: a cohort multicentre study. *Bone Joint J*. 2014; 96-B: 978–983. <https://doi.org/10.1302/0301-620X.96B7.32728> PMID: [24986954](https://pubmed.ncbi.nlm.nih.gov/24986954/)

36. Mackenney PJ, McQueen MM, Elton R. Prediction of instability in distal radial fractures. *J Bone Joint Surg Am.* 2006; 88: 1944–1951. <https://doi.org/10.2106/JBJS.D.02520> PMID: 16951109
37. Walenkamp MMJ, Aydin S, Mulders M a. M, Goslings JC, Schep NWL. Predictors of unstable distal radius fractures: a systematic review and meta-analysis. *J Hand Surg Eur Vol.* 2015. <https://doi.org/10.1177/1753193415604795> PMID: 26420817
38. Abramo A, Kopylov P, Tagil M. Evaluation of a treatment protocol in distal radius fractures: a prospective study in 581 patients using DASH as outcome. *Acta Orthop.* 2008; 79: 376–385. <https://doi.org/10.1080/17453670710015283> PMID: 18622842
39. The National Board of Health and Welfare (NBHW). Statistical database. 2020. Available: [https://sdb.socialstyrelsen.se/if\\_ald/](https://sdb.socialstyrelsen.se/if_ald/).
40. Van Doorn C, Gruber-Baldini AL, Zimmerman S, Richard Hebel J, Port CL, Baumgarten M, et al. Dementia as a Risk Factor for Falls and Fall Injuries Among Nursing Home Residents: FALLS AND DEMENTIA IN THE NURSING HOME. *Journal of the American Geriatrics Society.* 2003; 51: 1213–1218. <https://doi.org/10.1046/j.1532-5415.2003.51404.x> PMID: 12919232
41. Graafmans WC, Ooms ME, Bezemer PD, Bouter LM, Lips P. Different risk profiles for hip fractures and distal forearm fractures: a prospective study. *Osteoporos Int.* 1996; 6: 427–431. <https://doi.org/10.1007/BF01629573> PMID: 9116386
42. Mosenthal WP, Boyajian HH, Ham SA, Conti Mica MA. Treatment Trends, Complications, and Effects of Comorbidities on Distal Radius Fractures. *Hand (New York, N,Y).* 2019; 14: 534–539. <https://doi.org/10.1177/1558944717751194> PMID: 29388485
43. Kvernmo HD, Otterdal P, Balteskard L. Behandling av håndleddsbrudd 2009–14. *Tidsskriftet.* 2017 [cited 31 May 2021]. <https://doi.org/10.4045/tidsskr.17.0065> PMID: 29043745
44. Boersma EZ, Kortlever JTP, Nijhuis-Van Der Sanden MWG, Edwards MJR, Ring D, Teunis T. Reliability of recommendations to reduce a fracture of the distal radius. *Acta Orthopaedica.* 2021; 92: 131–136. <https://doi.org/10.1080/17453674.2020.1846853> PMID: 33183107
